# Supplementary material for: Climate and agronomy, not genetics, underpin recent maize yield gains in favorable environments
Source: PubMed Central journal article supplement (PMC8795556; doi:10.1073/pnas.2113629119), 2022-01-18
Supplement: pnas.2113629119.sapp.pdf [file pnas.2113629119.sapp.pdf]

1 **SI Appendix for Rizzo et al.**

2

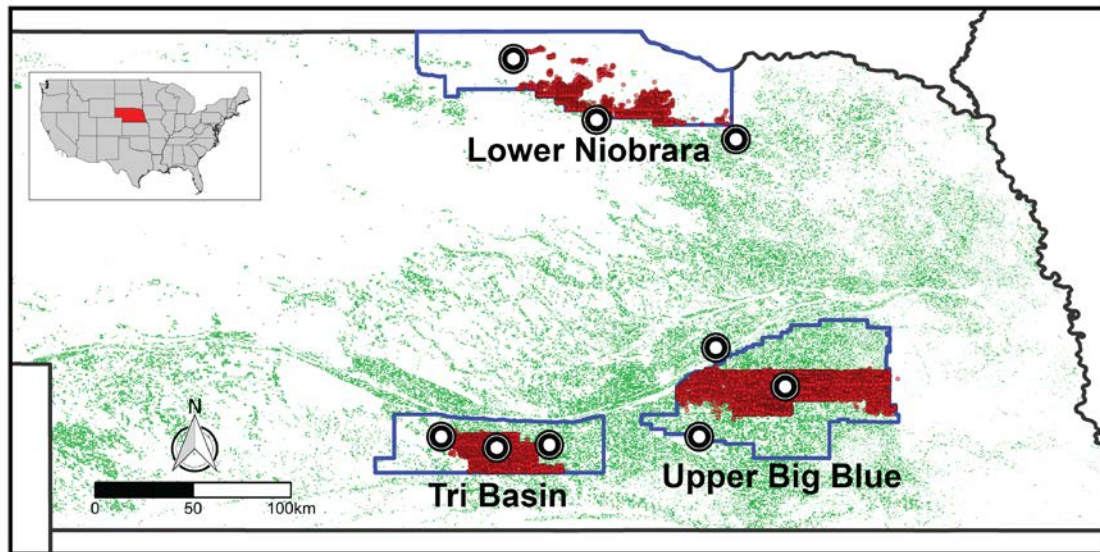

3

4 **Supplementary Fig. S1.** Location of the three regions (blue polygons), farmer fields  
5 (red dots), and weather stations (circles) within Nebraska (US). Distribution of  
6 irrigated maize area is shown in green. Inset shows location of Nebraska within the  
7 conterminous US.

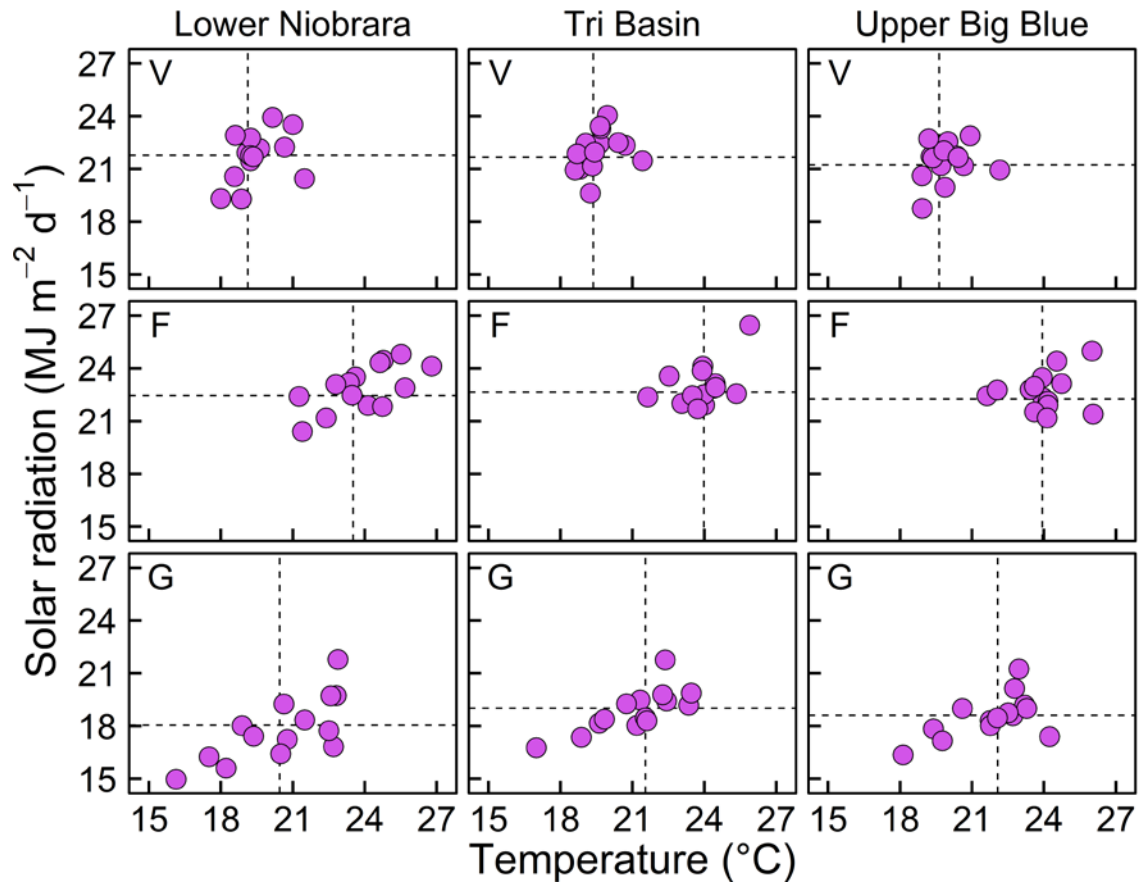

8

9 **Supplementary Fig. S2.** Average solar radiation and average temperature during  
 10 vegetative (V, top), flowering (F, middle), and grain filling phases (G, bottom) for each  
 11 of the three regions: Lower Niobrara (left), Tri Basin (middle), and Upper Big Blue  
 12 (right). Each symbol corresponds to the average value for a given year, region, and  
 13 crop phase. Values are averages calculated from measured data retrieved from three  
 14 weather stations located within or near each region (see Fig. 1). Dashed lines indicate  
 15 long-term (1998-2018) means.

16 **Supplementary Table S1.** Description of key biophysical and management variables and grain yield associated with irrigated maize fields  
 17 located within the three study regions in Nebraska during the 2005-2018 period. Values are means ( $\pm$  standard deviation). Average (2005-2018)  
 18 reporting fields per year ( $n$ ) is shown.

| Region                        | Solar radiation<br>(MJ m <sup>-2</sup> d <sup>-1</sup> ) and<br>temperature (°C) <sup>a</sup> | Precipitation and<br>ET <sub>0</sub> (mm) <sup>a</sup> | Dominant<br>soil series <sup>b</sup>     | AWHC<br>(mm) <sup>b</sup> | Sowing<br>date<br>(DOY) <sup>c</sup> | Hybrid<br>relative<br>maturity (d) <sup>c</sup> | Plant<br>density<br>(m <sup>-2</sup> ) <sup>c</sup> | Irrigation<br>amount<br>(mm) <sup>d</sup> | Applied N<br>fertilizer<br>(kg N ha <sup>-1</sup> ) <sup>d</sup> | Maize yield<br>(Mg ha <sup>-1</sup> ) <sup>d</sup> |
|-------------------------------|-----------------------------------------------------------------------------------------------|--------------------------------------------------------|------------------------------------------|---------------------------|--------------------------------------|-------------------------------------------------|-----------------------------------------------------|-------------------------------------------|------------------------------------------------------------------|----------------------------------------------------|
| Lower<br>Niobrara<br>(n=487)  | SR: 14.3 $\pm$ 0.5<br>T: 9.3 $\pm$ 1.0                                                        | P: 557 $\pm$ 100<br>ET <sub>0</sub> : 1171 $\pm$ 136   | Jansen<br>loam &<br>Dunday<br>loamy sand | 141 $\pm$ 12              | 125 $\pm$ 3                          | 108 $\pm$ 2                                     | 8.1 $\pm$ 0.3                                       | 352 $\pm$ 125                             | 206 $\pm$ 45                                                     | 13.0 $\pm$ 1.8                                     |
| Tri Basin<br>(n=1405)         | SR: 15.1 $\pm$ 0.5<br>T: 10.3 $\pm$ 0.9                                                       | P: 524 $\pm$ 117<br>ET <sub>0</sub> : 1204 $\pm$ 110   | Holdrege<br>silt loam                    | 317 $\pm$ 3               | 117 $\pm$ 6                          | 112 $\pm$ 2                                     | 8.0 $\pm$ 0.5                                       | 293 $\pm$ 150                             | 207 $\pm$ 42                                                     | 13.5 $\pm$ 1.9                                     |
| Upper<br>Big Blue<br>(n=1047) | SR: 14.4 $\pm$ 0.4<br>T: 10.3 $\pm$ 0.9                                                       | P: 559 $\pm$ 120<br>ET <sub>0</sub> : 1097 $\pm$ 97    | Hastings<br>silt loam                    | 285 $\pm$ 4               | 118 $\pm$ 4                          | 113 $\pm$ 2                                     | 8.1 $\pm$ 0.5                                       | 277 $\pm$ 84                              | 204 $\pm$ 48                                                     | 13.2 $\pm$ 1.2                                     |

19 <sup>a</sup> Annual averages for solar radiation (SR) and temperature (T) and cumulative values for precipitation (P) and grass-based Penman-Monteith-  
 20 FAO reference evapotranspiration (ET<sub>0</sub>) calculated following Allen et al. (1998) based on three weather stations located within or near each of  
 21 the three regions selected for this study.

22 <sup>b</sup> Dominant soil series and average maximum available water holding capacity (AWHC; 0-1.5 m) retrieved from SSURGO soil database.

23 <sup>c</sup> Sowing date (DOY: day of year), hybrid relative maturity, and plant density retrieved from a separate database that includes *ca.* 75% of fields.

24 <sup>d</sup> Irrigation amount, applied N fertilizer, and maize grain yield retrieved from the NRD databases.

25

26 **Supplementary Table S2.** *Estimated total, climatic, and technological yield gains, expressed as absolute or compound annual rates, during the*  
 27 *2005-2018 period. The technological yield gain includes the contribution from both agronomic and genetic technologies.*

| Region <sup>†</sup> | Compound annual growth rate |                      |            | Yield gain                          |                      |            |
|---------------------|-----------------------------|----------------------|------------|-------------------------------------|----------------------|------------|
|                     | Total                       | Climate <sup>‡</sup> | Technology | Total                               | Climate <sup>‡</sup> | Technology |
|                     | % <i>p.a.</i>               |                      |            | kg ha <sup>-1</sup> y <sup>-1</sup> |                      |            |
| Lower Niobrara      | 1.27                        | 0.78                 | 0.49       | 178                                 | 109                  | 69         |
| Tri Basin           | 1.38                        | 0.51                 | 0.87       | 199                                 | 73                   | 126        |
| Upper Big Blue      | 1.29                        | 0.60                 | 0.69       | 181                                 | 84                   | 96         |
| Average             | 1.31                        | 0.63                 | 0.68       | 186                                 | 89                   | 97         |

28

29 <sup>†</sup> The three regions included in this study account for about 43% of total USA irrigated maize production area.

30 <sup>‡</sup> The climate-driven yield potential includes the CO<sub>2</sub> fertilization effect, which accounts for 6% of the overall climate-driven yield gain.

31

32 **Supplementary Table S3.** Changes in management practices between 2005 and 2018 based on survey data collected from a subset of farmers in  
 33 three regions: Lower Niobrara (n = 37), Tri-Basin (n = 127), and Upper Big Blue (n = 104). Averages for each year and the difference between  
 34 2018 and 2005 values are shown.

| Management practice                            | Lower Niobrara |      |        |                                                   | Tri Basin |      |        |                                                   | Upper Big Blue |      |        |                                                   |
|------------------------------------------------|----------------|------|--------|---------------------------------------------------|-----------|------|--------|---------------------------------------------------|----------------|------|--------|---------------------------------------------------|
|                                                | Average        |      | Change | Yield gain<br>kg ha <sup>-1</sup> y <sup>-1</sup> | Average   |      | Change | Yield gain<br>kg ha <sup>-1</sup> y <sup>-1</sup> | Average        |      | Change | Yield gain<br>kg ha <sup>-1</sup> y <sup>-1</sup> |
|                                                | 2005           | 2018 |        |                                                   | 2005      | 2018 |        |                                                   | 2005           | 2018 |        |                                                   |
| Grain yield (Mg ha <sup>-1</sup> )             | 11.9           | 14.2 | +2.3   | 164                                               | 12.3      | 14.8 | +2.5   | 179                                               | 12.0           | 14.3 | +2.3   | 164                                               |
| Sowing date (DOY)                              | 125            | 127  | +2     |                                                   | 117       | 119  | +2     |                                                   | 117            | 118  | +1     |                                                   |
| Seeding rate (seed m <sup>-2</sup> )           | 7.5            | 8.1  | +0.6*  | +28                                               | 7.3       | 8.0  | +0.7*  | +33                                               | 7.5            | 8.1  | +0.6*  | +28                                               |
| Cultivar relative maturity (d)                 | 108            | 108  | nil    |                                                   | 112       | 112  | nil    |                                                   | 113            | 113  | nil    |                                                   |
| Conservation tillage (% fields)                | 31             | 56   | +25*   | -6                                                | 38        | 88   | +50*   | -13                                               | 27             | 86   | +59*   | -15                                               |
| Rotation with soybean (% fields)               | 49             | 54   | +5     | +2                                                | 49        | 55   | +6*    | +2                                                | 46             | 51   | +5*    | +2                                                |
| Foliar fungicide and/or insecticide (% fields) | 26             | 23   | -3     |                                                   | 27        | 65   | +38*   | +8                                                | 26             | 69   | +43*   | +9                                                |
| Grazing prior crop stover (% fields)           | 58             | 57   | -1     |                                                   | 49        | 46   | -3     |                                                   | 31             | 34   | +3     |                                                   |
| Applied N fertilizer (kg N ha <sup>-1</sup> )  | 199            | 218  | +19*   | +29                                               | 184       | 223  | +39*   | +59                                               | 185            | 220  | +35*   | +53                                               |

35 DOY: day of year. Asterisks indicate statistically significant difference (p<0.05) using t-test or chi-square test (for variables with normal or  
 36 binomial distribution, respectively).

37

38 **Supplementary Table S4.** Yield benefit in irrigated maize per unit change in management practices based on data from the literature. Also  
 39 shown is the source of data of each study and associated study region and associated years.

| Management practice                                                    | Yield change (kg ha <sup>-1</sup> ) due to unit change in management practice | Source of data and associated region and years | Source                 |
|------------------------------------------------------------------------|-------------------------------------------------------------------------------|------------------------------------------------|------------------------|
| Seeding rate (seed m <sup>-2</sup> )                                   | +650                                                                          | Farmers' data in Nebraska (2005-2007)          | Grassini et al. (2011) |
| Conservation <i>versus</i> conventional tillage (% fields)             | -350 <sup>a</sup>                                                             | Farmers' data in Nebraska (2005-2007)          | Grassini et al. (2011) |
| Rotation with soybean <i>versus</i> continuous maize (% fields)        | +500                                                                          | Farmers' data in Nebraska (2005-2007)          | Grassini et al. (2011) |
| Foliar fungicide and/or insecticide <i>versus</i> untreated (% fields) | +302                                                                          | Field trials in US Corn Belt (2002-2009)       | Paul et al. (2011)     |
| Nitrogen (N) fertilizer (kg N ha <sup>-1</sup> )                       | NRE × NPE <sup>b</sup>                                                        | Field trials in Nebraska (2002-2004)           | Wortmann et al. (2011) |

40

41 <sup>a</sup> Only in continuous maize. No yield penalty reported when maize was rotated with soybean.

42 <sup>b</sup> Nitrogen recovery efficiency (NRE) calculated as:  $y = 0.937 - 0.0018 \times N$ ; nitrogen physiological efficiency (NPE, kg grain kg<sup>-1</sup> N uptake)  
 43 calculated as  $y = 31.39 + 37.75 \times 0.993^N$ .

44

45 **Supplementary Table S5.** Contribution of adoption of improved agronomic practices  
 46 and genetic yield potential to the overall technological yield gain, expressed as absolute  
 47 or compound annual rates.

| Region <sup>†</sup> | Compound annual growth rate |           |          | Yield gain                          |           |          |
|---------------------|-----------------------------|-----------|----------|-------------------------------------|-----------|----------|
|                     | Technology                  | Agronomic | Genetics | Technology                          | Agronomic | Genetics |
|                     | % <i>p.a.</i>               |           |          | kg ha <sup>-1</sup> y <sup>-1</sup> |           |          |
| Lower Niobrara      | 0.49                        | 0.37      | 0.12     | 69                                  | 53        | 16       |
| Tri Basin           | 0.87                        | 0.61      | 0.26     | 126                                 | 89        | 37       |
| Upper Big Blue      | 0.69                        | 0.55      | 0.14     | 96                                  | 77        | 19       |
| Average             | 0.68                        | 0.51      | 0.17     | 97                                  | 73        | 24       |

48

49
